# Supplementary material
Source: publisher figshare collection journal article supplement (https://acs.figshare.com/ndownloader/files/8874646)
Supplement: Supplementary file 1 [file 8874646]

Compound_ID	SMILES	KU812 EC50 (µM)	K562 EC50 (µM)	KG1a EC50 (µM)	MV4-11 EC50 (µM)
5	OCCOC1=CC=C2C(C=CN2CC3=CC=CC=C3)=C1
6a	CC(CC1)(C)C2=C(C=CC([H])=C2)N1CCOC3=CC=C4C(C=CN4CC5=CC=CC=C5)=C3
6b	CC(CC1)(C)C2=C(C=CC(Br)=C2)N1CCOC3=CC=C4C(C=CN4CC5=CC=CC=C5)=C3
7	CC1(C)C2=C(C=CC(C#N)=C2)N(CCOC3=CC(C=CN4CC5=CC=CC=C5)=C4C=C3)CC1
8	CC1(C)C2=C(C=CC(C(C3CCCCC3)=O)=C2)N(CCOC4=CC(C=CN5CC6=CC=CC=C6)=C5C=C4)CC1
9	CC1(C)C2=C(C=CC(C3(C4CCCCC4)OCCO3)=C2)N(CCOC5=CC(C=CN6CC7=CC=CC=C7)=C6C=C5)CC1
10	CC1(C)C2=C(C=CC(C3(C4CCCCC4)OCCO3)=C2)N(CCOC5=CC(C=CN6)=C6C=C5)CC1
11	CC1(C)C2=C(C=CC(C(C3CCCCC3)=O)=C2)N(CCOC4=CC(C=CN5)=C5C=C4)CC1
12	CC1(C)C2=C(C=CC(C(C3CCCCC3)=O)=C2)N(CCOC4=CC(C=CN5CC(OCC)=O)=C5C=C4)CC1
13	CC1(C)C2=C(C=CC(C(C3CCCCC3)=O)=C2)N(CCOC4=CC(C=CN5CC(O)=O)=C5C=C4)CC1	196.57 ± 16.11	8658.96 ± 59.52
14	CC(CC1)(C)C2=C(C=CC=C2)N1CCOC3=CC=C4C(C=CN4)=C3	14.63 ± 2.04	78.13 ± 2.73
15a	CC(CC1)(C)C2=C(C=CC=C2)N1CCOC3=CC=C4C(C=CN4C)=C3
15b	CC(CC1)(C)C2=C(C=CC=C2)N1CCOC3=CC=C4C(C=CN4CC(OCC)=O)=C3
15c	CC(CC1)(C)C2=C(C=CC=C2)N1CCOC3=CC=C4C(C=CN4CC(O)=O)=C3
16	CC(CC1)(C)C2=C(C=CC(Br)=C2)N1CCOC3=CC=C4C(C=CN4)=C3	7.59 ± 0.63	15.58 ± 1.67
17a	CC(CC1)(C)C2=C(C=CC(C3=CC=CC=C3)=C2)N1CCOC4=CC=C5C(C=CN5)=C4
17b	CC(CC1)(C)C2=C(C=CC(C3=CC=C(F)C=C3)=C2)N1CCOC4=CC=C5C(C=CN5)=C4
17c	CC(CC1)(C)C2=C(C=CC(C3=CC=CC([N+]([O-])=O)=C3)=C2)N1CCOC4=CC=C5C(C=CN5)=C4
17d	CC(CC1)(C)C2=C(C=CC(C3=CSC=C3)=C2)N1CCOC4=CC=C5C(C=CN5)=C4
17e	CC(CC1)(C)C2=C(C=CC(C3=CC=CO3)=C2)N1CCOC4=CC=C5C(C=CN5)=C4
17f	CC(CC1)(C)C2=C(C=CC(C3=CC=CN=C3)=C2)N1CCOC4=CC=C5C(C=CN5)=C4	5.38 ± 0.01	8.74 ± 1.54	2.64 ± 0.51	3.55 ± 0.47
17g	CC(CC1)(C)C2=C(C=CC(C3=CC=C(Cl)N=C3)=C2)N1CCOC4=CC=C5C(C=CN5)=C4	5.41 ± 1.39	13.04 ± 3.21
17h	CC(CC1)(C)C2=C(C=CC(C3=CC=NC=C3)=C2)N1CCOC4=CC=C5C(C=CN5)=C4	9.38 ± 1.18	22.65 ± 1.09
17i	CC(CC1)(C)C2=C(C=CC(C3=CC=C(S(N4CCN(C)CC4)(=O)=O)C=C3)=C2)N1CCOC5=CC=C6C(C=CN6)=C5
18	CC(CC1)(C)C2=C(C=CC(C3=CC=CC=N3)=C2)N1CCOC4=CC=C5C(C=CN5)=C4
